# Supplementary material
Source: PubMed Central journal article supplement (PMC4432762)
Supplement: IAI.03075-14_zii999091260so2.pdf [file IAI.03075-14_zii999091260so2.pdf]

**Table S1: Individual absorbance values and percent PrestoBlue reduction\* of 1-day, 4-day, and 7-day uninfected explants.**

| Explant               | 570 nm | 600 nm | PrestoBlue reduction (%)* |
|-----------------------|--------|--------|---------------------------|
| <b>1-day explants</b> |        |        |                           |
| A1                    | 1.5    | 0.334  | 73.73                     |
| A2                    | 1.552  | 0.386  | 74.697                    |
| A3                    | 1.475  | 0.487  | 66.216                    |
| B1                    | 1.499  | 0.497  | 67.207                    |
| B2                    | 1.498  | 0.501  | 66.99                     |
| B3                    | 1.548  | 0.542  | 68.233                    |
| C1                    | 1.494  | 0.422  | 69.877                    |
| C2                    | 1.499  | 0.427  | 69.969                    |
| C3                    | 1.529  | 0.521  | 67.972                    |
| <b>4-day explants</b> |        |        |                           |
| A4                    | 1.331  | 0.404  | 61.713                    |
| A5                    | 1.439  | 0.464  | 65.639                    |
| A6                    | 1.388  | 0.399  | 65.266                    |
| B4                    | 1.248  | 0.371  | 58.163                    |
| B5                    | 1.532  | 0.51   | 69.268                    |
| B6                    | 1.22   | 0.489  | 51.78                     |
| C4                    | 1.314  | 0.401  | 60.883                    |
| C5                    | 1.341  | 0.416  | 61.808                    |
| C6                    | 1.105  | 0.337  | 51.164                    |
| <b>7-day explants</b> |        |        |                           |
| A7                    | 1.271  | 0.952  | 35.792                    |
| A8                    | 1.302  | 0.946  | 37.843                    |
| A9                    | 1.223  | 0.872  | 36.229                    |
| B7                    | 1.287  | 0.884  | 39.444                    |
| B8                    | 1.207  | 0.981  | 30.966                    |
| B9                    | 1.245  | 0.976  | 33.372                    |
| C7                    | 1.214  | 0.819  | 37.812                    |
| C8                    | 1.271  | 1      | 33.882                    |
| C9                    | 1.251  | 0.89   | 37.11                     |

\*Percent dye reduction refers to chemical reduction of PrestoBlue, a resazurin-based chemical reagent

**Table S2: Fold accumulation<sup>1</sup> of porcine-origin proteins in media from biofilm-infected relative to biofilm-free explants.**

| Uniport identification | Description                                              | Fold (log <sub>2</sub> ) accumulation <sup>2</sup> |
|------------------------|----------------------------------------------------------|----------------------------------------------------|
| F1S585                 | Uncharacterized protein                                  | 11.63 ± 0.1                                        |
| I3LQJ0                 | Uncharacterized protein                                  | 11.63 ± 2.07                                       |
| I3L5Z3                 | Uncharacterized protein                                  | 11.24 ± 0.99                                       |
| F1SM78                 | Uncharacterized protein                                  | 11.15 ± 0.61                                       |
| MYL9                   | Myosin regulatory light polypeptide 9                    | 10.78 ± 0.88                                       |
| F1SB42                 | Uncharacterized protein                                  | 10.6 ± 0.15                                        |
| F1RNX2                 | Programmed cell death protein 5                          | 10.41 ± 0.01                                       |
| F1SSF7                 | Uncharacterized protein                                  | 10.27 ± 2.27                                       |
| D0G7F7                 | Tropomyosin 4                                            | 9.82 ± 2.94                                        |
| I3LTH8                 | Uncharacterized protein                                  | 9.69 ± 2.53                                        |
| F1RQR4                 | Uncharacterized protein                                  | 9.55 ± 1.93                                        |
| F1STR9                 | Uncharacterized protein                                  | 9.35 ± 2.03                                        |
| F1S3M9                 | Uncharacterized protein                                  | 8.81 ± 0.32                                        |
| F1RKG9                 | Uncharacterized protein                                  | 8.79 ± 2.66                                        |
| LIMA1                  | LIM domain and actin-binding protein 1                   | 8.38 ± 1.92                                        |
| K7GNZ3                 | Uncharacterized protein                                  | 7.64 ± 2.33                                        |
| K9IWG9                 | Tensin-1                                                 | 7.54 ± 1.84                                        |
| Q2XVP5                 | Microtubule-associated protein RP/EB family member 1     | 7.52 ± 2.05                                        |
| F1SGD7                 | Uncharacterized protein                                  | 7.51 ± 3.75                                        |
| B3F0B7                 | Cellular retinoic acid binding protein                   | 7.36 ± 3.25                                        |
| F1SG00                 | Uncharacterized protein                                  | 7.27 ± 0.96                                        |
| A9ED96                 | CARG-binding factor A                                    | 6.53 ± 3.12                                        |
| F1SC51                 | Uncharacterized protein                                  | 6.46 ± 1.6                                         |
| COF1                   | Cofilin-1                                                | 6.46 ± 3.41                                        |
| I3LU55                 | Uncharacterized protein                                  | 6.29 ± 2.34                                        |
| A3EX84                 | Lectin galactoside-binding soluble 3                     | 6.01 ± 2.72                                        |
| D0G778                 | Macrophage migration inhibitory factor                   | 5.85 ± 2.01                                        |
| B5L0Y3                 | Calpastatin                                              | 4.56 ± 1.86                                        |
| F1RS37                 | Uncharacterized protein                                  | 4.41 ± 2.1                                         |
| F1SH92                 | Inter-alpha-trypsin inhibitor heavy chain H4             | 4.08 ± 0.51                                        |
| Q19KE2                 | Fatty acid binding protein 5                             | 4.02 ± 1.42                                        |
| CAH3                   | Carbonic anhydrase 3                                     | 3.95 ± 0.73                                        |
| F1RII7                 | Hemoglobin subunit beta                                  | 3.71 ± 0.33                                        |
| I3L5D5                 | Uncharacterized protein                                  | 3.64 ± 0.15                                        |
| I3LUC8                 | Uncharacterized protein                                  | 3.62 ± 0.64                                        |
| F1SJS8                 | Uncharacterized protein                                  | 3.57 ± 0.7                                         |
| I3LQS0                 | Uncharacterized protein                                  | 3.4 ± 0.86                                         |
| I3LD72                 | Uncharacterized protein                                  | 3.35 ± 1.05                                        |
| Q5W7K7                 | Interleukin 6                                            | 3.27 ± 2.31                                        |
| F1RLQ2                 | Prelamin-A/C                                             | 3.26 ± 0.55                                        |
| F2Z5B6                 | Tropomyosin alpha-1 chain                                | 3.17 ± 0.62                                        |
| F1S827                 | Uncharacterized protein                                  | 3.16 ± 0.75                                        |
| F1SQW8                 | Uncharacterized protein                                  | 2.95 ± 0.64                                        |
| F1SQS2                 | Uncharacterized protein                                  | 2.95 ± 1.16                                        |
| B6DX83                 | V-crk sarcoma virus CT10 oncogene-like protein isoform b | 2.52 ± 0.55                                        |
| F1RJ93                 | Uncharacterized protein                                  | 2.15 ± 1.12                                        |
| VIME                   | Vimentin                                                 | 1.18 ± 0.53                                        |
| F1SMV6                 | Uncharacterized protein                                  | 0.68 ± 0.24                                        |
| F1S021                 | Uncharacterized protein                                  | -1.33 ± 0.45                                       |
| CFAD                   | Complement factor D                                      | -1.59 ± 0.72                                       |
| F1S285                 | Uncharacterized protein                                  | -1.6 ± 0.61                                        |
| I3LRH7                 | Uncharacterized protein                                  | -1.64 ± 0.59                                       |
| F1SRS2                 | Uncharacterized protein                                  | -1.78 ± 0.56                                       |
| A7U5U2                 | Ubiquitin B                                              | -1.8 ± 0.03                                        |
| I3LEE6                 | Uncharacterized protein                                  | -1.84 ± 0.26                                       |

|        |                                              |               |
|--------|----------------------------------------------|---------------|
| G8FUN5 | Y box binding protein 1                      | -1.95 ± 0.22  |
| A8D737 | T-cadherin                                   | -2.24 ± 1.18  |
| E2I6L6 | Insulin-like growth factor-binding protein 5 | -2.69 ± 1.25  |
| Q00P28 | Beta-2-microglobulin protein                 | -2.74 ± 0.69  |
| F1SS26 | Uncharacterized protein                      | -2.9 ± 0.89   |
| F1S9V5 | Uncharacterized protein                      | -2.98 ± 0.69  |
| F1S895 | Uncharacterized protein                      | -2.99 ± 1.81  |
| K7GKR9 | Uncharacterized protein                      | -2.99 ± 0.33  |
| I3LLI8 | Uncharacterized protein                      | -3 ± 1.44     |
| G8ENL4 | FUS                                          | -3.5 ± 0.74   |
| MOES   | Moesin                                       | -3.63 ± 1.1   |
| F1RYI8 | Uncharacterized protein                      | -3.78 ± 0.17  |
| I3LJX2 | Uncharacterized protein                      | -3.82 ± 0.31  |
| I3LS72 | Uncharacterized protein                      | -3.86 ± 1.01  |
| I3LC64 | Uncharacterized protein                      | -3.89 ± 1.26  |
| I3LLD8 | Uncharacterized protein                      | -4.99 ± 0.23  |
| F1S4Y8 | Uncharacterized protein                      | -5.18 ± 0.44  |
| RNAS4  | Ribonuclease 4                               | -6.11 ± 1.9   |
| I3LI44 | Uncharacterized protein                      | -10.53 ± 1.42 |
| I3LPZ3 | Uncharacterized protein                      | -11.22 ± 1.17 |
| F1RT61 | Uncharacterized protein                      | -11.93 ± 0.1  |
| L8B0W9 | IgG heavy chain                              | -15.19 ± 5.05 |

<sup>1</sup>Comparisons were made using t-test (n=6,  $P < 0.05$ ) and changes in protein content were considered significant at a false discovery rate of less than 1%

<sup>2</sup>"-" sign preceding a number indicates fold decrease in a protein from biofilm-infected relative to biofilm-free explants

**Table S3: Abundance<sup>1</sup> of biofilm-origin proteins in media from *S. aureus*-infected explants.**

| UNIPROT identification | Description                                                            | Average abundance (log <sub>2</sub> ) <sup>2</sup> |
|------------------------|------------------------------------------------------------------------|----------------------------------------------------|
| N6T2M0                 | Chaperone dnaK                                                         | 6.44 ± 3.24                                        |
| H4DA51                 | Aspartate-semialdehyde dehydrogenase                                   | 7.09 ± 2.55                                        |
| N5GCT2                 | Enolase                                                                | 7.28 ± 3.71                                        |
| H3YUB5                 | Triacylglycerol lipase                                                 | 7.83 ± 3.92                                        |
| N5WBC0                 | Succinyl-CoA ligase [ADP-forming] subunit beta                         | 8.21 ± 0.84                                        |
| N5HZJ4                 | Alanine dehydrogenase 1                                                | 8.65 ± 1.14                                        |
| N4ZRD9                 | Transaldolase                                                          | 8.89 ± 0.2                                         |
| G8V0S2                 | Heme uptake protein IsdB                                               | 8.95 ± 0.93                                        |
| N5W0V3                 | GNAT family acetyltransferase                                          | 9.14 ± 0.3                                         |
| G8RED4                 | Virulence-associated cell-wall-anchored protein SasG                   | 9.34 ± 1.66                                        |
| N6RJM9                 | 50S ribosomal protein L9                                               | 9.52 ± 1.51                                        |
| N5E603                 | Nitrogen fixation protein NifU                                         | 9.53 ± 0.16                                        |
| D7RHB1                 | SpA IgG-binding domain protein                                         | 9.74 ± 1.05                                        |
| N5IN79                 | Uncharacterized protein                                                | 10.02 ± 0.5                                        |
| Q9L4P0                 | Transketolase, putative                                                | 10.09 ± 0.87                                       |
| C8MLC3                 | Glucosamine-6-phosphate isomerase                                      | 10.18 ± 0.27                                       |
| Q7WRR9                 | FmtB-like protein                                                      | 10.19 ± 0.74                                       |
| N5PDC8                 | 2'-5' RNA ligase                                                       | 10.28 ± 1.04                                       |
| N4Z3Q4                 | Uncharacterized protein                                                | 10.39 ± 1.21                                       |
| H4HHJ2                 | Aspartyl/glutamyl-tRNA(Asn/Gln) amidotransferase subunit C             | 10.75 ± 0.9                                        |
| H4H4R5                 | Putative uncharacterized protein                                       | 10.77 ± 0.77                                       |
| ADH                    | Alcohol dehydrogenase                                                  | 10.83 ± 1.56                                       |
| E7MUZ4                 | Beta-channel forming cytolysin                                         | 10.89 ± 0.53                                       |
| H3ZWG4                 | 30S ribosomal protein S8                                               | 11.05 ± 0.34                                       |
| K0LN55                 | 60 kDa chaperonin                                                      | 11.08 ± 0.22                                       |
| C8LF75                 | Virulence factor esxA                                                  | 11.1 ± 1.33                                        |
| H1THJ5                 | Elastin-binding protein EbpS                                           | 11.18 ± 0.31                                       |
| N5HT19                 | Elongation factor Ts                                                   | 11.2 ± 0.54                                        |
| D2FA31                 | Nickel ABC transporter, periplasmic nickel-binding protein             | 11.22 ± 0.39                                       |
| N5C0S7                 | Membrane protein                                                       | 11.27 ± 0.46                                       |
| H0AFU2                 | Putative uncharacterized protein                                       | 11.32 ± 0.71                                       |
| N5Y0M3                 | ATP-dependent Clp protease proteolytic subunit                         | 11.35 ± 0.4                                        |
| N5W6U5                 | Pyruvate kinase                                                        | 11.52 ± 0.78                                       |
| H3YQ62                 | PF09954 family protein                                                 | 11.56 ± 0.15                                       |
| H3RZY6                 | Putative uncharacterized protein                                       | 11.57 ± 0.53                                       |
| F3T8G3                 | Phosphoglycerate kinase                                                | 11.6 ± 0.72                                        |
| H4C116                 | Lipase                                                                 | 11.63 ± 0.25                                       |
| N6EWC2                 | Seryl-tRNA synthetase                                                  | 11.67 ± 0.14                                       |
| N5V6P8                 | 50S ribosomal protein L29                                              | 11.73 ± 0.19                                       |
| N6Q9Q5                 | L-lactate dehydrogenase 2                                              | 11.75 ± 0.09                                       |
| N5XFM1                 | 50S ribosomal protein L11                                              | 11.75 ± 0.55                                       |
| N6IZH4                 | 50S ribosomal protein L17                                              | 12.02 ± 0.33                                       |
| LTAS                   | Lipoteichoic acid synthase                                             | 12.36 ± 0.56                                       |
| N5Y3G8                 | Peptidyl-prolyl cis-trans isomerase B (Cyclophilin B)                  | 12.43 ± 0.88                                       |
| N6QHD8                 | General stress response protein CsbD                                   | 12.49 ± 0.75                                       |
| N5G4G5                 | Succinyl-CoA ligase [ADP-forming] subunit alpha                        | 12.55 ± 0.29                                       |
| H4AWF5                 | 30S ribosomal protein S13                                              | 12.57 ± 0.11                                       |
| H4EKE4                 | Iron-regulated ABC transporter siderophore-binding protein SirA        | 12.58 ± 0.1                                        |
| H4BX29                 | 30S ribosomal protein S7                                               | 12.74 ± 0.48                                       |
| F3TLA6                 | 1-pyrroline-5-carboxylate dehydrogenase                                | 12.9 ± 0.58                                        |
| N5X4S3                 | 50S ribosomal protein L5                                               | 12.99 ± 0.37                                       |
| FTSZ                   | Cell division protein FtsZ                                             | 13.01 ± 0.81                                       |
| N4Z0Y4                 | Transcription elongation factor greA                                   | 13.33 ± 0.49                                       |
| H0CTB1                 | Putative uncharacterized protein                                       | 13.39 ± 0.27                                       |
| N6AC37                 | 30S ribosomal protein S10                                              | 13.43 ± 0.12                                       |
| RL31B                  | 50S ribosomal protein L31 type B                                       | 13.45 ± 0.18                                       |
| N6IKU5                 | Thioredoxin                                                            | 13.47 ± 0.51                                       |
| N6PXS9                 | Uncharacterized protein                                                | 13.58 ± 0.58                                       |
| N5EN69                 | 50S ribosomal protein L21                                              | 13.68 ± 0.47                                       |
| N5JJD4                 | 50S ribosomal protein L10                                              | 13.72 ± 0.15                                       |
| R9D9I9                 | PTS system, glucose-specific enzyme II, A component                    | 13.76 ± 0.49                                       |
| D2N540                 | Manganese ABC transporter substrate-binding lipoprotein (Adhesin B) (S | 13.82 ± 1.35                                       |
| H1TCG7                 | N-acetylmuramoyl-L-alanine amidase Sle1                                | 13.87 ± 0.32                                       |

|        |                                                  |              |
|--------|--------------------------------------------------|--------------|
| N1N515 | N-acetylmuramoyl-L-alanine amidase, family 4     | 13.96 ± 0.43 |
| I0JAT6 | LPXTG surface protein                            | 14.15 ± 0.61 |
| H3X8A1 | Putative uncharacterized protein                 | 14.16 ± 0.34 |
| N6RCZ1 | Lipoprotein                                      | 14.43 ± 0.45 |
| N5YZX5 | Stage V sporulation protein G                    | 14.46 ± 0.11 |
| FIB    | Fibrinogen-binding protein                       | 14.47 ± 0.57 |
| H4A334 | Glyceraldehyde-3-phosphate dehydrogenase, type I | 14.52 ± 0.66 |
| N5ENW5 | Elongation factor G                              | 14.57 ± 0.05 |
| H3YFB8 | Putative transglycosylase IsaA                   | 14.83 ± 0.44 |
| F0D2G6 | Stress response protein                          | 14.87 ± 0.08 |
| N6HVU9 | Complement inhibitor SCIN                        | 14.91 ± 0.12 |
| N4Y4Z6 | Ribosome-recycling factor                        | 15.01 ± 0.1  |
| L7C3X1 | Alkaline shock protein 23                        | 15.05 ± 0.3  |
| Q7A060 | SsaA protein                                     | 15.1 ± 0.39  |
| N5ADM6 | Translation initiation factor IF-1               | 15.18 ± 0.29 |
| N6LPZ1 | Serine-aspartate repeat-containing protein E     | 15.23 ± 0.17 |
| N6SJN3 | UPF0342 protein                                  | 15.26 ± 0.26 |
| H4B1P1 | Cold shock protein CspA                          | 15.48 ± 0.8  |
| H4E902 | Putative exported protein                        | 15.53 ± 0.31 |
| RL7    | 50S ribosomal protein L7/L12                     | 15.54 ± 0.38 |
| I3F8X4 | DNA-binding protein HU                           | 15.54 ± 0.45 |
| H3X3W1 | Trigger factor                                   | 15.75 ± 0.3  |
| C8KRJ1 | Putative uncharacterized protein                 | 15.88 ± 0.09 |
| H4E5E4 | Glycerophosphoryl diester phosphodiesterase      | 16.05 ± 0.47 |
| N5WXZ3 | Immunoglobulin G-binding protein A               | 16.06 ± 0.29 |
| N5F0W7 | Thermonuclease                                   | 16.48 ± 0.43 |
| RS6    | 30S ribosomal protein S6                         | 16.56 ± 0.23 |
| D6T6U9 | Putative uncharacterized protein                 | 16.62 ± 0.41 |
| N6FXZ1 | 30S ribosomal protein S1                         | 16.65 ± 0.18 |
| D4U986 | Elongation factor Tu                             | 16.78 ± 0.19 |
| N4Z8G9 | Uncharacterized protein                          | 17.32 ± 0.29 |
| N5QIW4 | Fructose-bisphosphate aldolase class 1           | 17.33 ± 0.5  |
| L7C4C8 | Bifunctional autolysin                           | 17.46 ± 0.11 |

<sup>1</sup>Protein abundance is calculated from sum of all unique normalized-peptide- ion abundances representing a protein in a sample.

<sup>2</sup>The average protein abundance ( ± SE) was calculated from three biological replicates.

**Table S4: Likely role of some *S. aureus* biofilm-origin soluble proteins on dermal explants.**

| UNIPROT identification | Description                                    | Average abundance (log <sub>2</sub> ) <sup>1</sup> | Likely role in dermal tissue                                                                                                                                                                                                                                      |
|------------------------|------------------------------------------------|----------------------------------------------------|-------------------------------------------------------------------------------------------------------------------------------------------------------------------------------------------------------------------------------------------------------------------|
| N5HZJ4                 | Alanine dehydrogenase 1                        | 8.65 ± 1.14                                        | This enzyme catalyzes alanine to pyruvate, NADH and ammonium ion (1) and could contribute to increase in pH in dermal explants. Alanine is essential amino acid for <i>S. aureus</i> growth (2).                                                                  |
| G8V0S2                 | Heme uptake protein IsdB                       | 8.95 ± 0.93                                        | Hemoglobin is present in dermal explants. <i>S. aureus</i> can use IsdB to acquire iron in dermal tissue                                                                                                                                                          |
| D7RHB1                 | SpA IgG-binding domain protein                 | 9.74 ± 1.05                                        | Very low amounts of IgG were found in media from infected explants. This strongly suggests that SpA binds and traps IgG in tissue matrix.                                                                                                                         |
| C8MLC3                 | Glucosamine-6-phosphate isomerase              | 10.18 ± 0.27                                       | This enzyme converts glucosamine-6-phosphate to fructose-6-phosphate and urea (3). Hyaluronic acid as an extracellular matrix protein is rich in glucosamine (4). The production of ammonia by this enzyme could contribute to high pH seen in dermal tissue      |
| E7MUZ4                 | Beta-channel forming cytolysin                 | 10.89 ± 0.53                                       | Possible involvement in killing of cells in dermal tissue                                                                                                                                                                                                         |
| H1THJ5                 | Elastin-binding protein EbpS                   | 11.18 ± 0.31                                       | Elastin is abundant in dermis (4). <i>S. aureus</i> can bind elastin and other extracellular matrix proteins (5).                                                                                                                                                 |
| N5Y0M3                 | ATP-dependent Clp protease proteolytic subunit | 11.35 ± 0.4                                        | This enzyme uses ATP to cleave damaged proteins within bacterial cells and is highly expressed by <i>S. aureus</i> biofilms (6)                                                                                                                                   |
| N6Q9Q5                 | L-lactate dehydrogenase 2                      | 11.75 ± 0.09                                       | Converts pyruvate to lactate and vice versa (4). The bacterial LDH can contribute to higher activity of LDH activity seen in spent media from dermal tissue                                                                                                       |
| F3TLA6                 | 1-pyrroline-5-carboxylate dehydrogenase        | 12.9 ± 0.58                                        | This enzyme catabolizes proline for energy generation (7). <i>S. aureus</i> likely consumes proline as an energy source. Proline is a major constituent of collagen found in abundance in dermis (4) and is essential amino acid for <i>S. aureus</i> growth (2). |
| N1N515                 | N-acetylmuramoyl-L-alanine amidase, family 4   | 13.96 ± 0.43                                       | Induces autolysis (8). Possible role in explant biofilm autolysis                                                                                                                                                                                                 |
| I0JAT6                 | LPXTG surface protein                          | 14.15 ± 0.61                                       | Surface proteins with LPXTG sequence help <i>S. aureus</i> bind extracellular cell matrix proteins (9). <i>S. aureus</i> binds tightly to dermal tissue                                                                                                           |
| FIB                    | Fibrinogen-binding protein                     | 14.47 ± 0.57                                       | <i>S. aureus</i> could use this protein to bind fibrinogen in dermal tissue                                                                                                                                                                                       |
| L7C3X1                 | Alkaline shock protein                         | 15.05 ± 0.3                                        | This protein is highly expressed under alkaline conditions (10). <i>S. aureus</i> -infected dermal tissue had higher pH                                                                                                                                           |
| Q7A060                 | SsaA protein                                   | 15.1 ± 0.39                                        | This protein is an endopeptidase (11) and may have a role in dermal biofilm bacterial lysis                                                                                                                                                                       |
| N5F0W7                 | Thermonuclease                                 | 16.48 ± 0.43                                       | This enzyme degrades DNA (12) and might contribute to DNA degradation in dermal cells                                                                                                                                                                             |
| L7C4C8                 | Bifunctional autolysin                         | 17.46 ± 0.11                                       | This protein hydrolyzes peptidoglycan (13). In addition to its role in cell division, this enzyme could lyse bacterial cells in biofilms. <b>Bacterial cell lysis was observed in dermal biofilms.</b>                                                            |

<sup>1</sup>Protein abundance was calculated from the sum of all unique normalized-peptide- ion abundances of a protein in a sample, and the average protein abundance (± S.E.) was calculated from three different biological replicates.

## References

- Bellion E, Tan F (1987) An NAD<sup>+</sup>-dependent alanine dehydrogenase from a methylotrophic bacterium. *Biochem J* 244: 565-570.
- Becker SA, Palsson BO (2005) Genome-scale reconstruction of the metabolic network in *Staphylococcus aureus* N315: An initial draft to the two-dimensional annotation. *BMC Microbiol* 5: 8.
- Midelfort CF, Rose IA (1977) Studies on the mechanism of *Escherichia coli* glucosamine-6-phosphate isomerase. *Biochemistry* 16: 1590-1596.
- Murray RK, Keeley FW (2009) The extracellular matrix. In: Murray K, Rodwell V, Bender D, Botham KM, Weil PA et al., editors. *Harper's illustrated biochemistry*. 28<sup>th</sup> ed: New York: McGraw-Hill. pp. 535-555
- Hermans K, Devriese LA, Haesebrouck F (2008) *Staphylococcus*. In: Gyles CL, Prescott JF, Songer G, Thoen CO, editors. *Pathogenesis of bacterial infections in animals*. 4<sup>th</sup> ed: John Wiley & Sons. pp. 75-90.
- Frees D, Chastanet A, Qazi S, Sorensen K, Hill P, et al. (2004) Clp ATPases are required for stress tolerance, intracellular replication and biofilm formation in *Staphylococcus aureus*. *Mol Microbiol* 54: 1445-1462.
- Meile L, Leisinger T (1982) Purification and properties of the bifunctional proline dehydrogenase/1-pyrroline-5-carboxylate dehydrogenase from *Pseudomonas aeruginosa*. *Eur J Biochem* 129: 67-75.
- Oshida T, Sugai M, Komatsuzawa H, Hong Y-M, Suginaka H, et al. (1995) A *Staphylococcus aureus* autolysin that has an N-acetylmuramoyl-L-alanine amidase domain and an endo-beta-N-acetylglucosaminidase domain: Cloning, sequence analysis, and characterization. *Proc Natl Acad Sci USA* 92: 285-289.
- Smeltzer M, Beenken KE (2013) *Staphylococcus aureus*. In: McVey DS, Kennedy M, Chengappa MM, editors. *Vet Microbiol*. 3<sup>rd</sup> ed: John Wiley & Sons. pp. 184-193.
- Kuroda M, Ohta T, Hayashi H (1995) Isolation and the gene cloning of an alkaline shock protein in methicillin resistant *Staphylococcus aureus*. *Biochem Biophys Res Commun* 207: 978-984.
- Delaune A, Poupel O, Mallet A, Coic YM, Msadek T, et al. (2011) Peptidoglycan crosslinking relaxation plays an important role in *Staphylococcus aureus* WalkR-dependent cell viability. *PLoS One* 6: e17054.
- Hu Y, Meng J, Shi C, Hervin K, Fratamico PM, et al. (2013) Characterization and comparative analysis of a second thermonuclease from *Staphylococcus aureus*. *Microbiol Res* 168: 174-182.
- Dubrac S, Boneca IG, Poupel O, Msadek T (2007) New insights into the Walk/WalR (YycG/YycF) essential signal transduction pathway reveal a major role in controlling cell wall metabolism and biofilm formation in *Staphylococcus aureus*. *J Bacteriol* 189: 8257-8269.
